# Supplementary material for: Excited States of Bromopyrimidines Probed by VUV Photoabsorption Spectroscopy and Theoretical Calculations
Source: MDPI journal article supplement (doi:10.3390/ijms22126460), 2021-06-16
Supplement: s1 [file s1]

## Supplementary Material

# Excited States of Bromopyrimidines Probed by VUV Photoabsorption Spectroscopy and Theoretical Calculations

Mónica Mendes <sup>1,\*</sup>, Fábris Kossoski <sup>2,\*</sup>, Ana I. Lozano <sup>1</sup>, João Pereira-da-Silva <sup>1</sup>, Rodrigo Rodrigues <sup>1</sup>, João Ameixa <sup>1</sup>, Nykola C. Jones <sup>3</sup>, Søren V. Hoffmann <sup>3</sup> and Filipe Ferreira da Silva <sup>1</sup>

<sup>1</sup> CEFITEC, Departamento de Física, NOVA School of Science and Technology, FCT NOVA, Universidade NOVA de Lisboa, 2829-516 Caparica, Portugal; ai.lozano@fct.unl.pt (A.I.L.); jvp.silva@campus.fct.unl.pt (J.P.-d.-S.); rar09843@campus.fct.unl.pt (R.R.); j.ameixa@campus.fct.unl.pt (J.A.); f.ferreiradasilva@fct.unl.pt (F.F.d.S.)

<sup>2</sup> Laboratoire de Chimie et Physique Quantiques (UMR 5626), Université de Toulouse, CNRS, UPS, CEDEX 09, 31062 Toulouse, France

<sup>3</sup> ISA, Department of Physics and Astronomy, Aarhus University, Ny Munkegade 120, 8000 Aarhus C, Denmark; nykj@phys.au.dk (N.C.J.); vronning@phys.au.dk (S.V.H.)

\* Correspondence: mf.mendes@fct.unl.pt (M.M.); fkossoski@irsamc.ups-tlse.fr (F.K.)

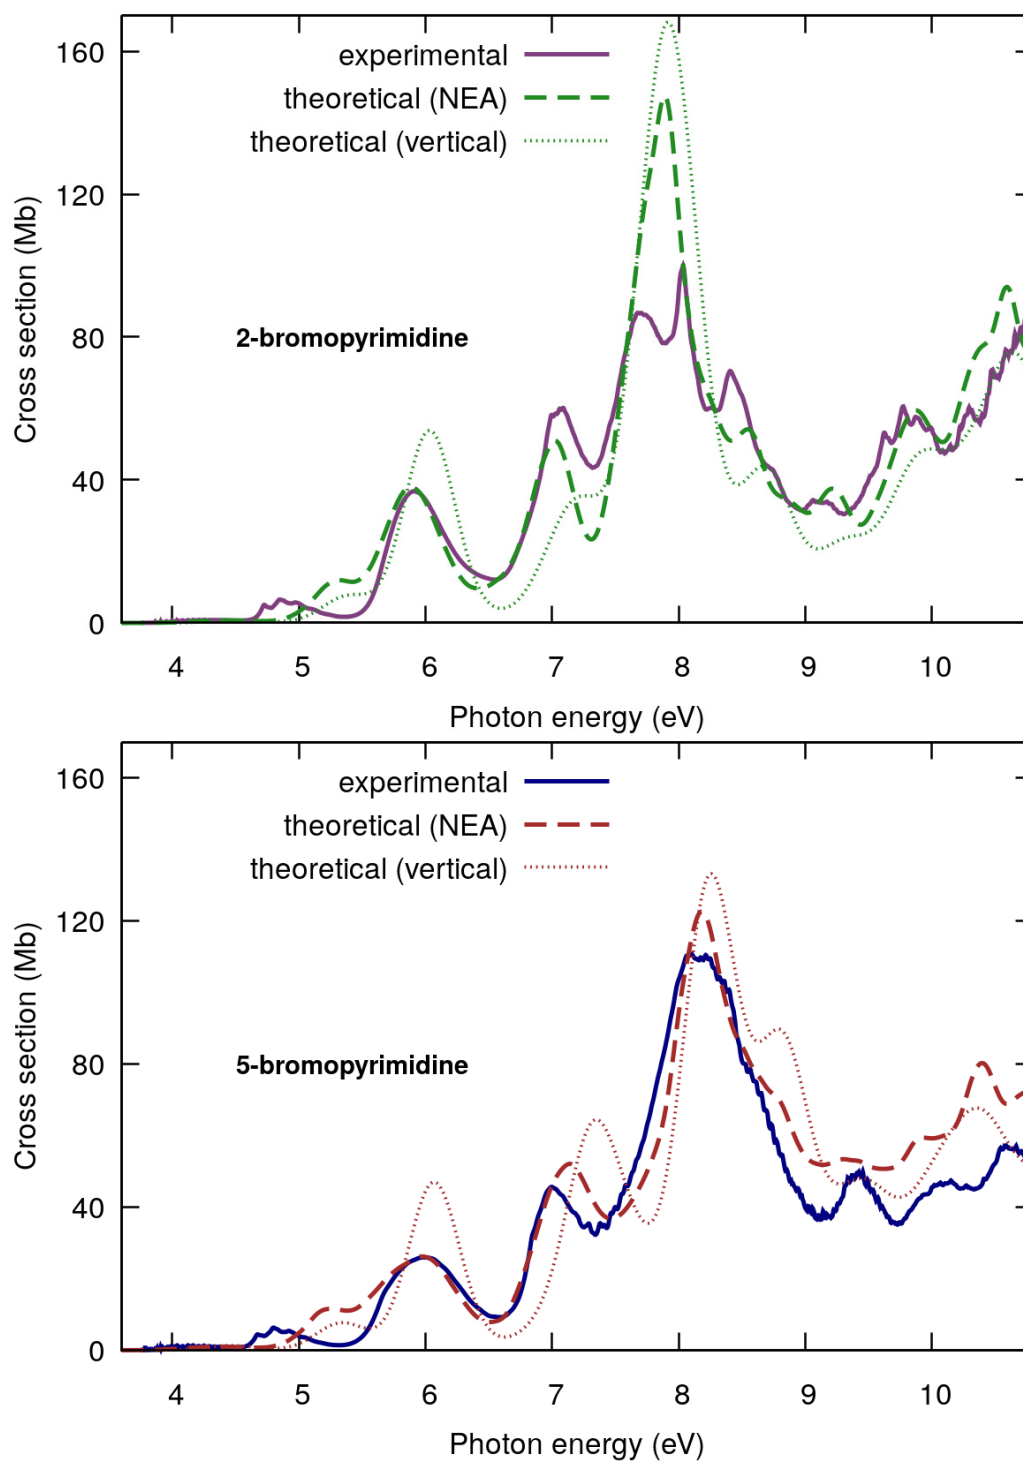

**Figure S1.** Comparison between measured and theoretical absorption cross sections for 2-bromopyrimidine (top) and 5-bromopyrimidine (bottom), the latter computed with the vertical approximation (for an arbitrary linewidth of 0.4 eV) and with the nuclear ensemble approach (NEA).

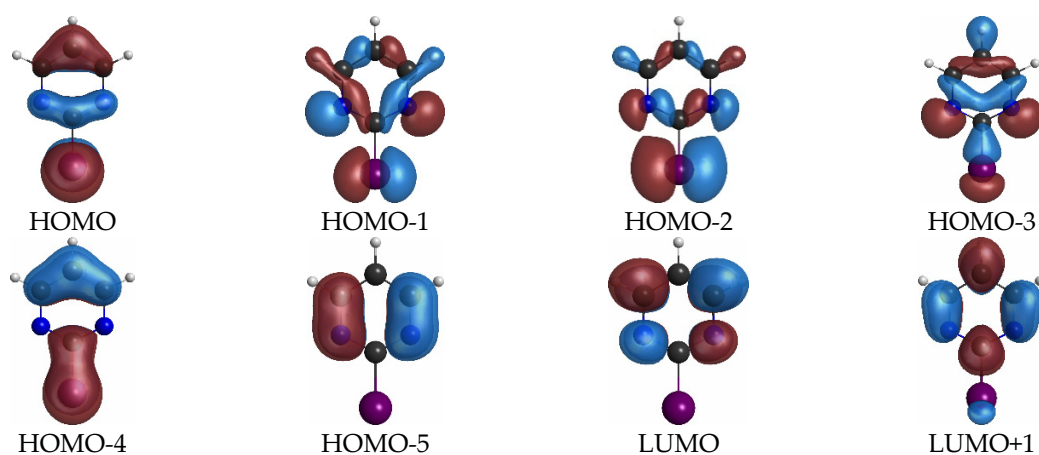

**Figure S2.** The frontier canonical orbitals for 2-bromopyrimidine.

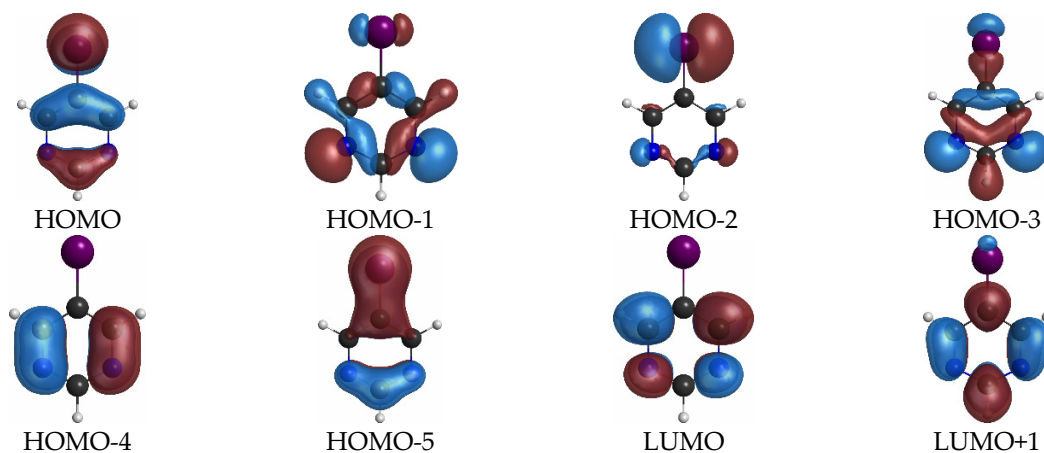

**Figure S3.** The frontier canonical orbitals for 5-bromopyrimidine.

Set of geometries optimized at the CAM-B3LYP/aug-cc-pVDZ+2s2p2d level of theory:

Ground state ( $S_0$ ) geometry (in angstrom) of 2-bromopyrimidine

```

C  0.000000  0.000000 -0.144547
N  0.000000  1.189023 -0.724716
N  0.000000 -1.189023 -0.724716
C  0.000000  1.180041 -2.058947
C  0.000000 -1.180041 -2.058947
C  0.000000  0.000000 -2.791483
H  0.000000  2.155443 -2.548233
H  0.000000 -2.155443 -2.548233
H  0.000000  0.000000 -3.879105

```

Br 0.000000 0.000000 1.755575

First excited state ( $S_1$ ) geometry (in angstrom) of 2-bromopyrimidine

C 0.000000 0.000000 -0.086024

N 0.000000 1.119786 -0.750749

N 0.000000 -1.119786 -0.750749

C 0.000000 1.192639 -2.129466

C 0.000000 -1.192639 -2.129466

C 0.000000 0.000000 -2.844207

H 0.000000 2.178314 -2.583072

H 0.000000 -2.178314 -2.583072

H 0.000000 0.000000 -3.933463

Br 0.000000 0.000000 1.792716

Ground state ( $S_0$ ) geometry (in angstrom) of 5-bromopyrimidine

C 0.000000 0.000000 -2.764489

N 0.000000 1.189493 -2.166023

N 0.000000 -1.189493 -2.166023

C 0.000000 1.189164 -0.834710

C 0.000000 -1.189164 -0.834710

C 0.000000 0.000000 -0.115937

H 0.000000 2.155526 -0.328742

H 0.000000 -2.155526 -0.328742

Br 0.000000 0.000000 1.775297

H 0.000000 0.000000 -3.854496

First excited state ( $S_1$ ) geometry (in angstrom) of 5-bromopyrimidine

C 0.196112 2.857635 0.000000

N 1.241155 2.085856 0.000000

N -0.997666 2.259002 0.000000

C 1.269757 0.721378 0.000000

C -1.124591 0.886310 0.000000

C 0.000000 0.099947 0.000000

H 2.219114 0.201108 0.000000

H -2.130184 0.475844 0.000000

Br -0.117817 -1.783517 0.000000

H 0.282577 3.940519 0.000000

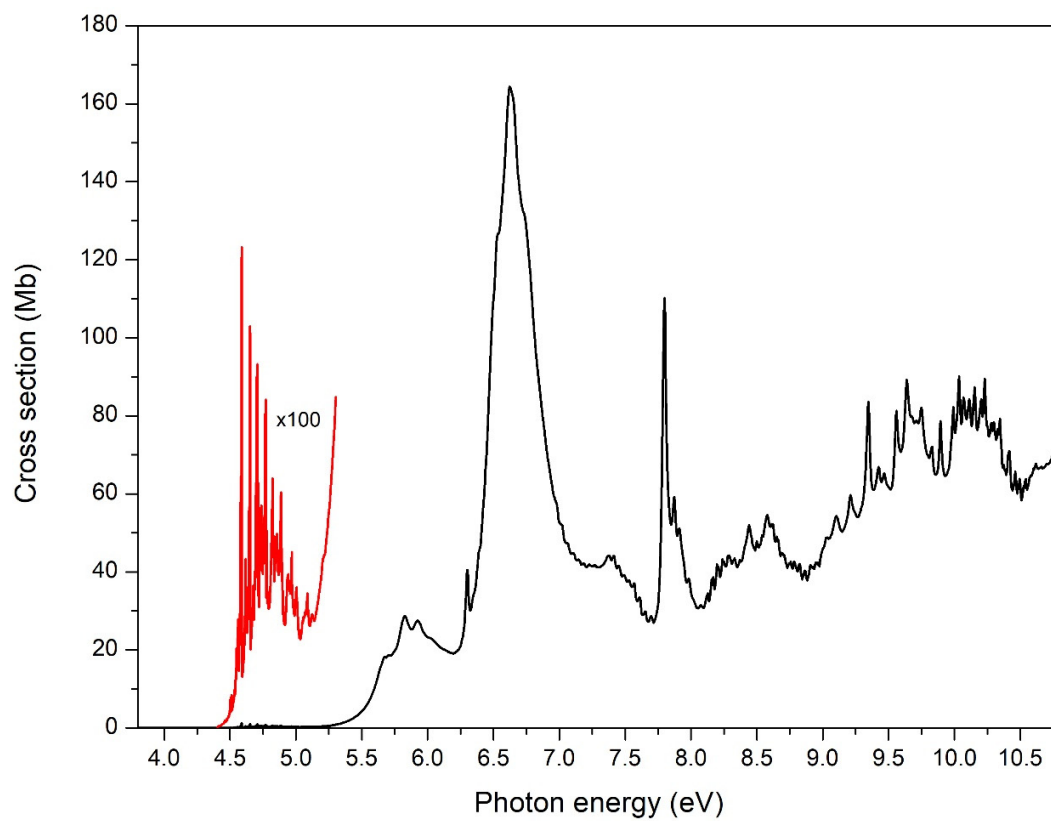

**Figure S4.** High-resolution VUV photoabsorption spectrum of bromobenzene in the 3.7–10.8 eV photon energy range. The original data was kindly provided by Palmer et al. [47] and can also be found online in the MPI-Mainz UV/VIS Spectral Atlas of Gaseous Molecules of Atmospheric Interest ([www.uv-vis-spectral-atlas-mainz.org](http://www.uv-vis-spectral-atlas-mainz.org)).

**Table S1.** Ground state ( $S_0$ ) frequencies (in  $\text{cm}^{-1}$ ) of 2-bromopyrimidine.

|    | Symmetry       | Harmonic freq. | Anharmonic freq. | Character                               |
|----|----------------|----------------|------------------|-----------------------------------------|
| 1  | a <sub>1</sub> | 3243.7         | 3114.9           | H's stretching                          |
| 2  |                | 3196.2         | 3065.5           | H's stretching                          |
| 3  |                | 1645.4         | 1606.5           | ring stretching                         |
| 4  |                | 1439.1         | 1413.1           | ring stretching / H's symmetric rocking |
| 5  |                | 1196.5         | 1178.0           | ring stretching / H's symmetric rocking |
| 6  |                | 1104.5         | 1090.0           | ring stretching                         |
| 7  |                | 1019.3         | 1005.9           | ring stretching                         |
| 8  |                | 756.9          | 748.9            | ring stretching                         |
| 9  |                | 336.7          | 336.6            | C-Br stretching                         |
| 10 | a <sub>2</sub> | 1019.6         | 992.5            | H's twisting                            |
| 11 |                | 419.5          | 410.2            | ring deformation                        |
| 12 | b <sub>1</sub> | 1024.3         | 998.4            | H's wagging/twisting                    |
| 13 |                | 823.8          | 810.5            | H's wagging                             |
| 14 |                | 803.8          | 787.5            | ring deformation                        |
| 15 |                | 486.3          | 476.1            | ring deformation                        |
| 16 |                | 150.9          | 150.9            | Br wagging (out-of-plane)               |
| 17 | b <sub>2</sub> | 3199.3         | 3083.5           | H's stretching                          |
| 18 |                | 1638.2         | 1596.1           | ring stretching                         |
| 19 |                | 1467.8         | 1442.8           | ring stretching / H's symmetric rocking |
| 20 |                | 1299.7         | 1282.4           | H's asymmetric rocking                  |
| 21 |                | 1244.1         | 1200.9           | ring stretching                         |
| 22 |                | 1115.4         | 1101.7           | H rocking                               |
| 23 |                | 637.6          | 633.0            | ring deformation                        |
| 24 |                | 274.5          | 273.4            | Br rocking (in-plane)                   |

**Table S2.** First excited state ( $S_0$ ) frequencies (in  $\text{cm}^{-1}$ ) of 2-bromopyrimidine.

|    | Symmetry       | Harmonic freq. | Anharmonic freq. | Character                               |
|----|----------------|----------------|------------------|-----------------------------------------|
| 1  | a <sub>1</sub> | 3267.9         | 3135.3           | H's stretching                          |
| 2  |                | 3225.8         | 3096.7           | H's stretching                          |
| 3  |                | 1530.7         | 1497.1           | ring stretching                         |
| 4  |                | 1439.3         | 1411.8           | ring stretching / H's symmetric rocking |
| 5  |                | 1163.9         | 1145.3           | ring stretching / H's symmetric rocking |
| 6  |                | 1071.6         | 1057.4           | ring stretching                         |
| 7  |                | 968.1          | 955.3            | ring stretching                         |
| 8  |                | 728.6          | 720.9            | ring stretching                         |
| 9  |                | 330.5          | 330.3            | C-Br stretching                         |
| 10 | a <sub>2</sub> | 598.4          | 582.5            | H's twisting                            |
| 11 |                | 232.4          | 227.0            | ring deformation                        |
| 12 | b <sub>1</sub> | 934.9          | 914.8            | H wagging                               |
| 13 |                | 709.3          | 695.2            | H's wagging / ring deformation          |
| 14 |                | 549.1          | 538.0            | ring deformation                        |
| 15 |                | 481.3          | 471.5            | ring deformation                        |
| 16 |                | 168.9          | 168.8            | Br wagging (out-of-plane)               |
| 17 | b <sub>2</sub> | 3254.4         | 3136.7           | H's stretching                          |
| 18 |                | 1384.6         | 1350.8           | ring stretching                         |
| 19 |                | 1341.9         | 1311.6           | ring stretching / H's symmetric rocking |
| 20 |                | 1240.5         | 1217.2           | H's asymmetric rocking                  |
| 21 |                | 1035.4         | 1018.9           | H rocking                               |
| 22 |                | 873.2          | 856.9            | ring stretching                         |
| 23 |                | 370.8          | 367.6            | ring deformation                        |
| 24 |                | 194.1          | 193.0            | Br rocking (in-plane)                   |

**Table S3.** Ground state ( $S_0$ ) frequencies (in  $\text{cm}^{-1}$ ) of 5-bromopyrimidine.

|    | Symmetry       | Harmonic freq. | Anharmonic freq. | Character                               |
|----|----------------|----------------|------------------|-----------------------------------------|
| 1  | a <sub>1</sub> | 3212.0         | 3089.6           | H's stretching                          |
| 2  |                | 3204.7         | 3060.7           | H's stretching                          |
| 3  |                | 1640.0         | 1599.2           | ring stretching                         |
| 4  |                | 1458.6         | 1424.7           | ring stretching / H's symmetric rocking |
| 5  |                | 1180.0         | 1168.3           | H's rocking / ring stretching           |
| 6  |                | 1128.7         | 1111.8           | ring breathing                          |
| 7  |                | 1045.6         | 1027.7           | ring stretching                         |
| 8  |                | 756.2          | 746.4            | ring stretching                         |
| 9  |                | 333.4          | 325.1            | C-Br stretching                         |
| 10 | a <sub>2</sub> | 1006.3         | 975.4            | H's twisting / ring deformation         |
| 11 |                | 423.7          | 415.8            | ring deformation                        |
| 12 | b <sub>1</sub> | 1034.6         | 1004.1           | H's wagging/twisting                    |
| 13 |                | 948.4          | 921.4            | H's wagging / ring deformation          |
| 14 |                | 745.2          | 728.9            | ring deformation                        |
| 15 |                | 436.3          | 427.6            | ring deformation                        |
| 16 |                | 171.0          | 166.1            | Br wagging (out-of-plane)               |
| 17 | b <sub>2</sub> | 3205.0         | 3069.2           | H's stretching                          |
| 18 |                | 1635.8         | 1597.2           | ring stretching                         |
| 19 |                | 1467.3         | 1440.6           | H rocking / ring stretching             |
| 20 |                | 1365.3         | 1331.8           | H's symmetric rocking                   |
| 21 |                | 1238.1         | 1208.7           | ring stretching                         |
| 22 |                | 1221.3         | 1198.5           | ring stretching / H's rocking           |
| 23 |                | 635.5          | 628.1            | ring stretching                         |
| 24 |                | 247.4          | 244.3            | Br rocking (in-plane)                   |

**Table S4.** First excited state ( $S_1$ ) frequencies (in  $\text{cm}^{-1}$ ) of 5-bromopyrimidine.

|    | Symmetry | Harmonic freq. | Anharmonic freq. | Character                     |
|----|----------|----------------|------------------|-------------------------------|
| 1  | $a'$     | 3287.1         | 3155.7           | H stretching                  |
| 2  |          | 3252.6         | 3109.6           | H stretching                  |
| 3  |          | 3246.2         | 3114.9           | H stretching                  |
| 4  |          | 1595.2         | 1557.2           | ring stretching               |
| 5  |          | 1470.7         | 1436.9           | ring stretching / H's rocking |
| 6  |          | 1382.3         | 1356.1           | H rocking                     |
| 7  |          | 1319.0         | 1289.3           | ring stretching               |
| 8  |          | 1288.8         | 1257.5           | H's rocking                   |
| 9  |          | 1165.6         | 1150.4           | ring stretching / H's rocking |
| 10 |          | 1095.5         | 1078.4           | ring stretching               |
| 11 |          | 1058.7         | 1039.8           | ring stretching               |
| 12 |          | 989.4          | 972.6            | ring stretching               |
| 13 |          | 726.1          | 713.0            | ring stretching               |
| 14 |          | 715.3          | 705.1            | ring stretching               |
| 15 |          | 327.5          | 319.6            | C-Br stretching               |
| 16 |          | 251.2          | 248.1            | Br rocking (in-plane)         |
| 17 |          | 225.7          | 222.3            | ring stretching               |
| 18 | $a''$    | 933.7          | 906.8            | H wagging                     |
| 19 |          | 769.7          | 747.2            | H wagging                     |
| 20 |          | 574.5          | 560.4            | ring deformation              |
| 21 |          | 513.1          | 501.5            | ring deformation              |
| 22 |          | 447.8          | 436.0            | H wagging                     |
| 23 |          | 264.7          | 259.1            | ring deformation              |
| 24 |          | 162.6          | 157.8            | Br wagging (out-of-plane)     |

**Table S5.** Vibrational progression assignments for the low-energy tail (3.75 - 4.15 eV) of the absorption band I of 2-bromopyrimidine. From left to right, energies (in eV) of the experimental peak, and computed energies (in eV), intensities (in arbitrary units), and characters of the most important vibronic transitions between  $S_0$  and  $S_1$  electronic states. Several more transitions take place, however here we only show those with intensities larger than 0.5.

|       |       |     |                                       |
|-------|-------|-----|---------------------------------------|
| 3.828 | 3.827 | 1.3 | $9^1 \rightarrow 0$                   |
|       | 3.829 | 0.6 | $9^1;16^1 \rightarrow 16^1$           |
| 3.845 | 3.846 | 0.7 | $11^1 \rightarrow 11^1$               |
| 3.863 | 3.859 | 1.0 | $24^1 \rightarrow 24^1$               |
| 3.868 | 3.868 | 5.7 | $0 \rightarrow 0$                     |
|       | 3.871 | 2.6 | $16^1 \rightarrow 16^1$               |
|       | 3.873 | 1.2 | $16^2 \rightarrow 16^2$               |
|       | 3.875 | 0.5 | $16^3 \rightarrow 16^3$               |
| 3.885 | 3.887 | 1.1 | $11^1 \rightarrow 9^1;11^1$           |
| 3.902 | 3.899 | 1.6 | $24^1 \rightarrow 9^1;24^1$           |
| 3.909 | 3.902 | 0.7 | $24^1;16^1 \rightarrow 9^1;24^1;16^1$ |
|       | 3.909 | 8.5 | $0 \rightarrow 9^1$                   |
|       | 3.912 | 3.9 | $16^1 \rightarrow 9^1;16^1$           |
|       | 3.914 | 1.8 | $16^2 \rightarrow 9^1;16^2$           |
|       | 3.916 | 0.8 | $16^3 \rightarrow 9^1;16^3$           |
|       | 3.916 | 0.8 | $9^1 \rightarrow 8^1$                 |
|       | 3.921 | 0.7 | $24^1 \rightarrow 23^1;9^1$           |
| 3.924 | 3.928 | 0.8 | $11^1 \rightarrow 9^2;11^1$           |
| 3.943 | 3.940 | 1.2 | $24^1 \rightarrow 9^2;24^1$           |
|       | 3.943 | 0.5 | $24^1;16^1 \rightarrow 9^2;24^1;16^1$ |
| 3.949 | 3.945 | 1.0 | $9^1 \rightarrow 7^1$                 |
|       | 3.948 | 0.6 | $24^1 \rightarrow 8^1;24^1$           |
|       | 3.950 | 1.2 | $9^1 \rightarrow 9^3$                 |
|       | 3.950 | 6.3 | $0 \rightarrow 9^2$                   |
|       | 3.952 | 0.6 | $9^1;16^1 \rightarrow 9^3;16^1$       |
|       | 3.953 | 2.9 | $16^1 \rightarrow 9^2;16^1$           |

|       |       |     |                                   |
|-------|-------|-----|-----------------------------------|
| 3.956 | 3.955 | 1.3 | $16^2 \rightarrow 9^2; 16^2$      |
|       | 3.957 | 0.6 | $16^3 \rightarrow 9^2; 16^3$      |
|       | 3.958 | 0.9 | $9^1 \rightarrow 6^1$             |
|       | 3.958 | 3.3 | $0 \rightarrow 8^1$               |
|       | 3.960 | 1.5 | $16^1 \rightarrow 8^1; 16^1$      |
|       | 3.962 | 0.7 | $16^2 \rightarrow 8^1; 16^2$      |
|       | 3.964 | 0.5 | $11^1 \rightarrow 7^1; 11^1$      |
| 3.965 | 3.969 | 1.4 | $9^1 \rightarrow 5^1$             |
|       | 3.971 | 0.6 | $9^1; 16^1 \rightarrow 5^1; 16^1$ |
| 3.974 | 3.976 | 0.6 | $11^1 \rightarrow 8^1; 9^1; 11^1$ |
|       | 3.977 | 0.7 | $24^1 \rightarrow 7^1; 24^1$      |
|       | 3.981 | 0.6 | $24^1 \rightarrow 9^3; 24^1$      |
| 3.988 | 3.987 | 4.1 | $0 \rightarrow 7^1$               |
|       | 3.988 | 0.7 | $11^1 \rightarrow 5^1; 11^1$      |
|       | 3.989 | 0.9 | $24^1 \rightarrow 8^1; 9^1; 24^1$ |
|       | 3.989 | 1.9 | $16^1 \rightarrow 7^1; 16^1$      |
|       | 3.990 | 0.7 | $24^1 \rightarrow 6^1; 24^1$      |
|       | 3.991 | 1.1 | $9^1 \rightarrow 9^4$             |
|       | 3.991 | 3.1 | $0 \rightarrow 9^3$               |
|       | 3.991 | 0.9 | $16^2 \rightarrow 7^1; 16^2$      |
|       | 3.993 | 0.5 | $9^1; 16^1 \rightarrow 9^4; 16^1$ |
|       | 3.994 | 1.4 | $16^1 \rightarrow 9^3; 16^1$      |
| 3.998 | 3.996 | 0.6 | $16^2 \rightarrow 9^3; 16^2$      |
|       | 3.999 | 4.7 | $0 \rightarrow 8^1; 9^1$          |
|       | 4.000 | 3.9 | $0 \rightarrow 6^1$               |
|       | 4.001 | 1.1 | $24^1 \rightarrow 5^1; 24^1$      |
|       | 4.001 | 2.2 | $16^1 \rightarrow 8^1; 9^1; 16^1$ |
|       | 4.002 | 1.8 | $16^1 \rightarrow 6^1; 16^1$      |
|       | 4.003 | 1.0 | $16^2 \rightarrow 8^1; 9^1; 16^2$ |
|       | 4.004 | 0.8 | $16^2 \rightarrow 6^1; 16^2$      |
|       | 4.005 | 0.8 | $11^1 \rightarrow 7^1; 9^1; 11^1$ |
| 4.006 | 4.010 | 5.8 | $0 \rightarrow 5^1$               |
|       | 4.013 | 2.7 | $16^1 \rightarrow 5^1; 16^1$      |
|       | 4.015 | 1.2 | $16^2 \rightarrow 5^1; 16^2$      |
| 4.014 | 4.017 | 0.6 | $16^3 \rightarrow 5^1; 16^3$      |

|       |       |     |                                               |
|-------|-------|-----|-----------------------------------------------|
|       | 4.018 | 0.7 | $11^1 \rightarrow 6^1; 9^1; 11^1$             |
|       | 4.018 | 1.1 | $24^1 \rightarrow 7^1; 9^1; 24^1$             |
|       | 4.020 | 0.5 | $24^1; 16^1 \rightarrow 7^1; 9^1; 24^1; 16^1$ |
| 4.024 | 4.028 | 6.1 | $0 \rightarrow 7^1; 9^1$                      |
|       | 4.029 | 1.1 | $11^1 \rightarrow 5^1; 9^1; 11^1$             |
|       | 4.030 | 0.6 | $24^1 \rightarrow 8^1; 9^2; 24^1$             |
|       | 4.030 | 2.8 | $16^1 \rightarrow 7^1; 9^1; 16^1$             |
|       | 4.031 | 1.0 | $24^1 \rightarrow 6^1; 9^1; 24^1$             |
|       | 4.032 | 0.6 | $9^1 \rightarrow 9^5$                         |
|       | 4.032 | 1.1 | $0 \rightarrow 9^4$                           |
|       | 4.032 | 1.3 | $16^2 \rightarrow 7^1; 9^1; 16^2$             |
|       | 4.035 | 0.5 | $16^1 \rightarrow 9^4; 16^1$                  |
|       | 4.035 | 0.6 | $16^3 \rightarrow 7^1; 9^1; 16^3$             |
|       | 4.035 | 0.6 | $9^1 \rightarrow 7^1; 8^1$                    |
| 4.037 | 4.039 | 0.6 | $9^1 \rightarrow 8^1; 9^3$                    |
|       | 4.040 | 3.3 | $0 \rightarrow 8^1; 9^2$                      |
|       | 4.041 | 5.7 | $0 \rightarrow 6^1; 9^1$                      |
|       | 4.041 | 1.6 | $24^1 \rightarrow 5^1; 9^1; 24^1$             |
|       | 4.042 | 1.5 | $16^1 \rightarrow 8^1; 9^2; 16^1$             |
|       | 4.043 | 2.6 | $16^1 \rightarrow 6^1; 9^1; 16^1$             |
|       | 4.044 | 0.7 | $24^1; 16^1 \rightarrow 5^1; 9^1; 24^1; 16^1$ |
|       | 4.044 | 0.7 | $16^2 \rightarrow 8^1; 9^2; 16^2$             |
|       | 4.045 | 1.2 | $16^2 \rightarrow 6^1; 9^1; 16^2$             |
|       | 4.046 | 0.6 | $11^1 \rightarrow 7^1; 9^2; 11^1$             |
| 4.045 | 4.047 | 0.6 | $16^3 \rightarrow 6^1; 9^1; 16^3$             |
|       | 4.047 | 0.6 | $9^1 \rightarrow 6^1; 8^1$                    |
|       | 4.047 | 0.9 | $0 \rightarrow 8^2$                           |
|       | 4.051 | 8.5 | $0 \rightarrow 5^1; 9^1$                      |
|       | 4.054 | 3.9 | $16^1 \rightarrow 5^1; 9^1; 16^1$             |
|       | 4.054 | 1.0 | $0 \rightarrow 3^1$                           |
| 4.053 | 4.056 | 1.8 | $16^2 \rightarrow 5^1; 9^1; 16^2$             |
|       | 4.058 | 0.8 | $16^3 \rightarrow 5^1; 9^1; 16^3$             |
|       | 4.058 | 0.9 | $9^1 \rightarrow 5^1; 8^1$                    |
|       | 4.059 | 0.5 | $11^1 \rightarrow 6^1; 9^2; 11^1$             |
|       | 4.059 | 0.8 | $24^1 \rightarrow 7^1; 9^2; 24^1$             |
|       | 4.063 | 0.7 | $24^1 \rightarrow 5^1; 23^1; 9^1$             |

|       |       |     |                                               |
|-------|-------|-----|-----------------------------------------------|
| 4.063 | 4.068 | 0.8 | $9^1 \rightarrow 7^1; 9^3$                    |
|       | 4.069 | 4.5 | $0 \rightarrow 7^1; 9^2$                      |
|       | 4.070 | 0.8 | $11^1 \rightarrow 5^1; 9^2; 11^1$             |
|       | 4.071 | 2.1 | $16^1 \rightarrow 7^1; 9^2; 16^1$             |
|       | 4.072 | 0.8 | $24^1 \rightarrow 6^1; 9^2; 24^1$             |
|       | 4.073 | 0.9 | $16^2 \rightarrow 7^1; 9^2; 16^2$             |
| 4.077 | 4.076 | 0.7 | $9^1 \rightarrow 6^1; 7^1$                    |
|       | 4.076 | 2.3 | $0 \rightarrow 7^1; 8^1$                      |
|       | 4.079 | 1.1 | $16^1 \rightarrow 7^1; 8^1; 16^1$             |
|       | 4.080 | 0.5 | $9^1 \rightarrow 8^1; 9^4$                    |
|       | 4.081 | 0.8 | $9^1 \rightarrow 6^1; 9^3$                    |
|       | 4.081 | 1.5 | $0 \rightarrow 8^1; 9^3$                      |
|       | 4.081 | 4.1 | $0 \rightarrow 6^1; 9^2$                      |
|       | 4.082 | 1.1 | $24^1 \rightarrow 5^1; 9^2; 24^1$             |
|       | 4.083 | 0.7 | $16^1 \rightarrow 8^1; 9^3; 16^1$             |
|       | 4.084 | 1.9 | $16^1 \rightarrow 6^1; 9^2; 16^1$             |
|       | 4.085 | 0.5 | $24^1; 16^1 \rightarrow 5^1; 9^2; 24^1; 16^1$ |
|       | 4.086 | 0.9 | $16^2 \rightarrow 6^1; 9^2; 16^2$             |
| 4.085 | 4.087 | 1.0 | $9^1 \rightarrow 5^1; 7^1$                    |
|       | 4.088 | 1.2 | $0 \rightarrow 8^2; 9^1$                      |
|       | 4.089 | 2.2 | $0 \rightarrow 6^1; 8^1$                      |
|       | 4.090 | 0.6 | $24^1 \rightarrow 5^1; 8^1; 24^1$             |
|       | 4.090 | 0.6 | $16^1 \rightarrow 8^2; 9^1; 16^1$             |
|       | 4.091 | 1.0 | $16^1 \rightarrow 6^1; 8^1; 16^1$             |
|       | 4.092 | 1.1 | $9^1 \rightarrow 5^1; 9^3$                    |
|       | 4.092 | 6.2 | $0 \rightarrow 5^1; 9^2$                      |
|       | 4.094 | 0.5 | $9^1; 16^1 \rightarrow 5^1; 9^3; 16^1$        |
|       | 4.095 | 2.8 | $16^1 \rightarrow 5^1; 9^2; 16^1$             |
|       | 4.095 | 1.5 | $0 \rightarrow 3^1; 9^1$                      |
|       | 4.097 | 1.3 | $16^2 \rightarrow 5^1; 9^2; 16^2$             |
|       | 4.097 | 0.7 | $16^1 \rightarrow 3^1; 9^1; 16^1$             |
| 4.092 | 4.099 | 0.6 | $16^3 \rightarrow 5^1; 9^2; 16^3$             |
|       | 4.100 | 1.0 | $9^1 \rightarrow 5^1; 6^1$                    |
|       | 4.100 | 3.4 | $0 \rightarrow 5^1; 8^1$                      |
|       | 4.102 | 1.5 | $16^1 \rightarrow 5^1; 8^1; 16^1$             |
|       | 4.104 | 0.7 | $16^2 \rightarrow 5^1; 8^1; 16^2$             |
| 4.102 | 4.105 | 1.4 | $0 \rightarrow 7^2$                           |

|       |       |     |                                        |
|-------|-------|-----|----------------------------------------|
|       | 4.106 | 0.5 | $11^1 \rightarrow 5^1; 7^1; 11^1$      |
|       | 4.107 | 0.6 | $24^1 \rightarrow 7^1; 8^1; 9^1; 24^1$ |
|       | 4.108 | 0.6 | $16^1 \rightarrow 7^2; 16^1$           |
|       | 4.108 | 0.5 | $24^1 \rightarrow 6^1; 7^1; 24^1$      |
|       | 4.109 | 0.8 | $9^1 \rightarrow 7^1; 9^4$             |
|       | 4.110 | 2.1 | $0 \rightarrow 7^1; 9^3$               |
|       | 4.111 | 0.7 | $9^1 \rightarrow 5^2$                  |
|       | 4.112 | 1.0 | $16^1 \rightarrow 7^1; 9^3; 16^1$      |
| 4.116 | 4.117 | 3.3 | $0 \rightarrow 7^1; 8^1; 9^1$          |
|       | 4.118 | 2.8 | $0 \rightarrow 6^1; 7^1$               |
|       | 4.118 | 0.6 | $11^1 \rightarrow 5^1; 8^1; 9^1; 11^1$ |
|       | 4.119 | 0.8 | $24^1 \rightarrow 5^1; 7^1; 24^1$      |
|       | 4.120 | 0.6 | $24^1 \rightarrow 6^1; 8^1; 9^1; 24^1$ |
|       | 4.120 | 1.3 | $16^1 \rightarrow 6^1; 7^1; 16^1$      |
|       | 4.122 | 0.7 | $9^1 \rightarrow 6^1; 9^4$             |
|       | 4.122 | 0.5 | $0 \rightarrow 8^1; 9^4$               |
|       | 4.122 | 2.0 | $0 \rightarrow 6^1; 9^3$               |
|       | 4.122 | 0.6 | $16^2 \rightarrow 6^1; 7^1; 16^2$      |
|       | 4.123 | 0.5 | $24^1 \rightarrow 5^1; 9^3; 24^1$      |
|       | 4.125 | 0.9 | $16^1 \rightarrow 6^1; 9^3; 16^1$      |
| 4.125 | 4.129 | 4.3 | $0 \rightarrow 5^1; 7^1$               |
|       | 4.129 | 0.8 | $0 \rightarrow 8^2; 9^2$               |
|       | 4.130 | 3.1 | $0 \rightarrow 6^1; 8^1; 9^1$          |
|       | 4.131 | 1.3 | $0 \rightarrow 6^2$                    |
|       | 4.131 | 0.9 | $24^1 \rightarrow 5^1; 8^1; 9^1; 24^1$ |
|       | 4.131 | 2.0 | $16^1 \rightarrow 5^1; 7^1; 16^1$      |
|       | 4.132 | 0.7 | $24^1 \rightarrow 5^1; 6^1; 24^1$      |
|       | 4.132 | 1.4 | $16^1 \rightarrow 6^1; 8^1; 9^1; 16^1$ |
|       | 4.133 | 1.0 | $9^1 \rightarrow 5^1; 9^4$             |
|       | 4.133 | 0.6 | $16^1 \rightarrow 6^2; 16^1$           |
|       | 4.133 | 2.9 | $0 \rightarrow 5^1; 9^3$               |
|       | 4.133 | 0.9 | $16^2 \rightarrow 5^1; 7^1; 16^2$      |
|       | 4.134 | 0.7 | $16^2 \rightarrow 6^1; 8^1; 9^1; 16^2$ |
|       | 4.136 | 1.3 | $16^1 \rightarrow 5^1; 9^3; 16^1$      |
|       | 4.136 | 1.1 | $0 \rightarrow 3^1; 9^2$               |
|       | 4.136 | 0.5 | $11^1 \rightarrow 6^1; 7^1; 9^1; 11^1$ |
| 4.135 | 4.138 | 0.6 | $16^2 \rightarrow 5^1; 9^3; 16^2$      |
|       | 4.138 | 0.5 | $16^1 \rightarrow 3^1; 9^2; 16^1$      |

|       |     |                                        |
|-------|-----|----------------------------------------|
| 4.141 | 4.7 | $0 \rightarrow 5^1; 8^1; 9^1$          |
| 4.142 | 3.9 | $0 \rightarrow 5^1; 6^1$               |
| 4.143 | 0.5 | $24^1 \rightarrow 5^2; 24^1$           |
| 4.143 | 0.6 | $0 \rightarrow 3^1; 8^1$               |
| 4.144 | 1.8 | $16^1 \rightarrow 5^1; 6^1; 16^1$      |
| 4.146 | 0.8 | $16^2 \rightarrow 5^1; 6^1; 16^2$      |
| 4.146 | 2.0 | $0 \rightarrow 7^2; 9^1$               |
| 4.147 | 0.8 | $11^1 \rightarrow 5^1; 7^1; 9^1; 11^1$ |

**Table S6.** Vibrational progression assignments for the absorption band I (3.7 - 4.6 eV) of 2-bromopyrimidine. From left to right, energies (in eV) of the experimental peak, and computed energies (in eV), intensities (in arbitrary units), and characters of the most important vibronic transitions between  $S_0$  and  $S_1$  electronic states. Several more transitions take place, however here we only show those with intensities larger than 1.0.

|      |       |     |                                   |
|------|-------|-----|-----------------------------------|
| 3.87 | 3.827 | 1.3 | $9^1 \rightarrow 0$               |
|      | 3.859 | 1.0 | $24^1 \rightarrow 24^1$           |
|      | 3.868 | 5.7 | $0 \rightarrow 0$                 |
|      | 3.871 | 2.6 | $16^1 \rightarrow 16^1$           |
|      | 3.873 | 1.2 | $16^2 \rightarrow 16^2$           |
|      | 3.887 | 1.1 | $11^1 \rightarrow 9^1; 11^1$      |
|      |       |     |                                   |
| 3.91 | 3.899 | 1.6 | $24^1 \rightarrow 9^1; 24^1$      |
|      | 3.909 | 8.5 | $0 \rightarrow 9^1$               |
|      | 3.912 | 3.9 | $16^1 \rightarrow 9^1; 16^1$      |
|      | 3.914 | 1.8 | $16^2 \rightarrow 9^1; 16^2$      |
|      | 3.940 | 1.2 | $24^1 \rightarrow 9^2; 24^1$      |
|      |       |     |                                   |
| 3.96 | 3.945 | 1.0 | $9^1 \rightarrow 7^1$             |
|      | 3.950 | 1.2 | $9^1 \rightarrow 9^3$             |
|      | 3.950 | 6.3 | $0 \rightarrow 9^2$               |
|      | 3.953 | 2.9 | $16^1 \rightarrow 9^2; 16^1$      |
|      | 3.955 | 1.3 | $16^2 \rightarrow 9^2; 16^2$      |
|      | 3.958 | 3.3 | $0 \rightarrow 8^1$               |
|      | 3.960 | 1.5 | $16^1 \rightarrow 8^1; 16^1$      |
|      | 3.969 | 1.4 | $9^1 \rightarrow 5^1$             |
|      |       |     |                                   |
| 4.00 | 3.987 | 4.1 | $0 \rightarrow 7^1$               |
|      | 3.989 | 1.9 | $16^1 \rightarrow 7^1; 16^1$      |
|      | 3.991 | 1.1 | $9^1 \rightarrow 9^4$             |
|      | 3.991 | 3.1 | $0 \rightarrow 9^3$               |
|      | 3.994 | 1.4 | $16^1 \rightarrow 9^3; 16^1$      |
|      | 3.999 | 4.7 | $0 \rightarrow 8^1; 9^1$          |
|      | 4.000 | 3.9 | $0 \rightarrow 6^1$               |
|      | 4.001 | 1.1 | $24^1 \rightarrow 5^1; 24^1$      |
|      | 4.001 | 2.2 | $16^1 \rightarrow 8^1; 9^1; 16^1$ |
|      | 4.002 | 1.8 | $16^1 \rightarrow 6^1; 16^1$      |
|      | 4.003 | 1.0 | $16^2 \rightarrow 8^1; 9^1; 16^2$ |
|      | 4.010 | 5.8 | $0 \rightarrow 5^1$               |
|      | 4.013 | 2.7 | $16^1 \rightarrow 5^1; 16^1$      |
|      | 4.015 | 1.2 | $16^2 \rightarrow 5^1; 16^2$      |

|      |       |     |                                   |
|------|-------|-----|-----------------------------------|
|      | 4.018 | 1.1 | $24^1 \rightarrow 7^1; 9^1; 24^1$ |
| 4.04 | 4.028 | 6.1 | $0 \rightarrow 7^1; 9^1$          |
|      | 4.029 | 1.1 | $11^1 \rightarrow 5^1; 9^1; 11^1$ |
|      | 4.030 | 2.8 | $16^1 \rightarrow 7^1; 9^1; 16^1$ |
|      | 4.031 | 1.0 | $24^1 \rightarrow 6^1; 9^1; 24^1$ |
|      | 4.032 | 1.1 | $0 \rightarrow 9^4$               |
|      | 4.032 | 1.3 | $16^2 \rightarrow 7^1; 9^1; 16^2$ |
|      | 4.040 | 3.3 | $0 \rightarrow 8^1; 9^2$          |
|      | 4.041 | 5.7 | $0 \rightarrow 6^1; 9^1$          |
|      | 4.041 | 1.6 | $24^1 \rightarrow 5^1; 9^1; 24^1$ |
|      | 4.042 | 1.5 | $16^1 \rightarrow 8^1; 9^2; 16^1$ |
|      | 4.043 | 2.6 | $16^1 \rightarrow 6^1; 9^1; 16^1$ |
|      | 4.045 | 1.2 | $16^2 \rightarrow 6^1; 9^1; 16^2$ |
|      | 4.051 | 8.5 | $0 \rightarrow 5^1; 9^1$          |
|      | 4.054 | 3.9 | $16^1 \rightarrow 5^1; 9^1; 16^1$ |
|      | 4.054 | 1.0 | $0 \rightarrow 3^1$               |
|      | 4.056 | 1.8 | $16^2 \rightarrow 5^1; 9^1; 16^2$ |
| 4.08 | 4.069 | 4.5 | $0 \rightarrow 7^1; 9^2$          |
|      | 4.071 | 2.1 | $16^1 \rightarrow 7^1; 9^2; 16^1$ |
|      | 4.076 | 2.3 | $0 \rightarrow 7^1; 8^1$          |
|      | 4.079 | 1.1 | $16^1 \rightarrow 7^1; 8^1; 16^1$ |
|      | 4.081 | 1.5 | $0 \rightarrow 8^1; 9^3$          |
|      | 4.081 | 4.1 | $0 \rightarrow 6^1; 9^2$          |
|      | 4.082 | 1.1 | $24^1 \rightarrow 5^1; 9^2; 24^1$ |
|      | 4.084 | 1.9 | $16^1 \rightarrow 6^1; 9^2; 16^1$ |
|      | 4.087 | 1.0 | $9^1 \rightarrow 5^1; 7^1$        |
|      | 4.088 | 1.2 | $0 \rightarrow 8^2; 9^1$          |
|      | 4.089 | 2.2 | $0 \rightarrow 6^1; 8^1$          |
|      | 4.091 | 1.0 | $16^1 \rightarrow 6^1; 8^1; 16^1$ |
|      | 4.092 | 1.1 | $9^1 \rightarrow 5^1; 9^3$        |
|      | 4.092 | 6.2 | $0 \rightarrow 5^1; 9^2$          |
|      | 4.095 | 2.8 | $16^1 \rightarrow 5^1; 9^2; 16^1$ |
|      | 4.095 | 1.5 | $0 \rightarrow 3^1; 9^1$          |
|      | 4.097 | 1.3 | $16^2 \rightarrow 5^1; 9^2; 16^2$ |
|      | 4.100 | 1.0 | $9^1 \rightarrow 5^1; 6^1$        |
|      | 4.100 | 3.4 | $0 \rightarrow 5^1; 8^1$          |
|      | 4.102 | 1.5 | $16^1 \rightarrow 5^1; 8^1; 16^1$ |
|      | 4.105 | 1.4 | $0 \rightarrow 7^2$               |
|      | 4.110 | 2.1 | $0 \rightarrow 7^1; 9^3$          |

|      |       |     |                                        |
|------|-------|-----|----------------------------------------|
|      | 4.112 | 1.0 | $16^1 \rightarrow 7^1; 9^3; 16^1$      |
| 4.12 | 4.117 | 3.3 | $0 \rightarrow 7^1; 8^1; 9^1$          |
|      | 4.118 | 2.8 | $0 \rightarrow 6^1; 7^1$               |
|      | 4.120 | 1.3 | $16^1 \rightarrow 6^1; 7^1; 16^1$      |
|      | 4.122 | 2.0 | $0 \rightarrow 6^1; 9^3$               |
|      | 4.129 | 4.3 | $0 \rightarrow 5^1; 7^1$               |
|      | 4.130 | 3.1 | $0 \rightarrow 6^1; 8^1; 9^1$          |
|      | 4.131 | 1.3 | $0 \rightarrow 6^2$                    |
|      | 4.131 | 2.0 | $16^1 \rightarrow 5^1; 7^1; 16^1$      |
|      | 4.132 | 1.4 | $16^1 \rightarrow 6^1; 8^1; 9^1; 16^1$ |
|      | 4.133 | 1.0 | $9^1 \rightarrow 5^1; 9^4$             |
|      | 4.133 | 2.9 | $0 \rightarrow 5^1; 9^3$               |
|      | 4.136 | 1.3 | $16^1 \rightarrow 5^1; 9^3; 16^1$      |
|      | 4.136 | 1.1 | $0 \rightarrow 3^1; 9^2$               |
|      | 4.141 | 4.7 | $0 \rightarrow 5^1; 8^1; 9^1$          |
|      | 4.142 | 3.9 | $0 \rightarrow 5^1; 6^1$               |
|      | 4.144 | 1.8 | $16^1 \rightarrow 5^1; 6^1; 16^1$      |
|      | 4.146 | 2.0 | $0 \rightarrow 7^2; 9^1$               |
|      | 4.152 | 2.8 | $0 \rightarrow 5^2$                    |
|      | 4.155 | 1.3 | $16^1 \rightarrow 5^2; 16^1$           |
|      | 4.158 | 2.3 | $0 \rightarrow 7^1; 8^1; 9^2$          |
| 4.17 | 4.159 | 4.1 | $0 \rightarrow 6^1; 7^1; 9^1$          |
|      | 4.160 | 1.1 | $24^1 \rightarrow 5^1; 7^1; 9^1; 24^1$ |
|      | 4.170 | 6.2 | $0 \rightarrow 5^1; 7^1; 9^1$          |
|      | 4.171 | 2.1 | $0 \rightarrow 6^1; 8^1; 9^2$          |
|      | 4.172 | 1.8 | $0 \rightarrow 6^2; 9^1$               |
|      | 4.173 | 1.0 | $24^1 \rightarrow 5^1; 6^1; 9^1; 24^1$ |
|      | 4.174 | 1.0 | $0 \rightarrow 5^1; 9^4$               |
|      | 4.182 | 3.3 | $0 \rightarrow 5^1; 8^1; 9^2$          |
|      | 4.183 | 5.6 | $0 \rightarrow 5^1; 6^1; 9^1$          |
|      | 4.187 | 1.5 | $0 \rightarrow 7^2; 9^2$               |
|      | 4.193 | 4.0 | $0 \rightarrow 5^2; 9^1$               |
|      | 4.196 | 1.8 | $16^1 \rightarrow 5^2; 9^1; 16^1$      |
|      | 4.199 | 1.1 | $0 \rightarrow 7^1; 8^1; 9^3$          |
|      | 4.200 | 2.9 | $0 \rightarrow 6^1; 7^1; 9^2$          |
| 4.21 | 4.207 | 1.6 | $0 \rightarrow 6^1; 7^1; 8^1$          |
|      | 4.211 | 4.4 | $0 \rightarrow 5^1; 7^1; 9^2$          |
|      | 4.213 | 1.3 | $0 \rightarrow 6^2; 9^2$               |

|      |       |     |                                    |
|------|-------|-----|------------------------------------|
|      | 4.213 | 1.2 | $0 \rightarrow 3^1; 7^1; 9^1$      |
|      | 4.218 | 2.4 | $0 \rightarrow 5^1; 7^1; 8^1$      |
|      | 4.223 | 1.5 | $0 \rightarrow 5^1; 8^1; 9^3$      |
|      | 4.224 | 4.0 | $0 \rightarrow 5^1; 6^1; 9^2$      |
|      | 4.230 | 1.2 | $0 \rightarrow 5^1; 8^2; 9^1$      |
|      | 4.231 | 2.2 | $0 \rightarrow 5^1; 6^1; 8^1$      |
|      | 4.234 | 2.8 | $0 \rightarrow 5^2; 9^2$           |
|      | 4.236 | 1.1 | $0 \rightarrow 7^2; 8^1; 9^1$      |
|      | 4.237 | 1.3 | $16^1 \rightarrow 5^2; 9^2; 16^1$  |
|      | 4.237 | 1.3 | $0 \rightarrow 3^1; 5^1; 9^1$      |
|      | 4.241 | 1.4 | $0 \rightarrow 6^1; 7^1; 9^3$      |
|      | 4.242 | 1.6 | $0 \rightarrow 5^2; 8^1$           |
| 4.25 | 4.247 | 1.4 | $0 \rightarrow 5^1; 7^2$           |
|      | 4.248 | 2.2 | $0 \rightarrow 6^1; 7^1; 8^1; 9^1$ |
|      | 4.252 | 2.1 | $0 \rightarrow 5^1; 7^1; 9^3$      |
|      | 4.259 | 3.3 | $0 \rightarrow 5^1; 7^1; 8^1; 9^1$ |
|      | 4.260 | 2.9 | $0 \rightarrow 5^1; 6^1; 7^1$      |
|      | 4.264 | 1.8 | $0 \rightarrow 5^1; 6^1; 9^3$      |
|      | 4.271 | 2.1 | $0 \rightarrow 5^2; 7^1$           |
|      | 4.272 | 3.1 | $0 \rightarrow 5^1; 6^1; 8^1; 9^1$ |
|      | 4.273 | 1.3 | $0 \rightarrow 5^1; 6^2$           |
|      | 4.275 | 1.3 | $0 \rightarrow 5^2; 9^3$           |
|      | 4.277 | 1.3 | $0 \rightarrow 6^1; 7^2; 9^1$      |
|      | 4.283 | 2.2 | $0 \rightarrow 5^2; 8^1; 9^1$      |
|      | 4.284 | 1.9 | $0 \rightarrow 5^2; 6^1$           |
|      | 4.288 | 2.1 | $0 \rightarrow 5^1; 7^2; 9^1$      |
|      | 4.289 | 1.5 | $0 \rightarrow 6^1; 7^1; 8^1; 9^2$ |
|      | 4.290 | 1.3 | $0 \rightarrow 6^2; 7^1; 9^1$      |
| 4.29 | 4.300 | 2.3 | $0 \rightarrow 5^1; 7^1; 8^1; 9^2$ |
|      | 4.301 | 4.0 | $0 \rightarrow 5^1; 6^1; 7^1; 9^1$ |
|      | 4.312 | 2.9 | $0 \rightarrow 5^2; 7^1; 9^1$      |
|      | 4.313 | 2.1 | $0 \rightarrow 5^1; 6^1; 8^1; 9^2$ |
|      | 4.314 | 1.8 | $0 \rightarrow 5^1; 6^2; 9^1$      |
|      | 4.324 | 1.5 | $0 \rightarrow 5^2; 8^1; 9^2$      |
|      | 4.325 | 2.6 | $0 \rightarrow 5^2; 6^1; 9^1$      |
|      | 4.329 | 1.4 | $0 \rightarrow 5^1; 7^2; 9^2$      |
| 4.34 | 4.335 | 1.2 | $0 \rightarrow 5^3; 9^1$           |
|      | 4.341 | 1.0 | $0 \rightarrow 5^1; 7^1; 8^1; 9^3$ |

|      |       |     |                                         |
|------|-------|-----|-----------------------------------------|
|      | 4.342 | 2.8 | $0 \rightarrow 5^1; 6^1; 7^1; 9^2$      |
|      | 4.349 | 1.6 | $0 \rightarrow 5^1; 6^1; 7^1; 8^1$      |
|      | 4.353 | 2.0 | $0 \rightarrow 5^2; 7^1; 9^2$           |
|      | 4.355 | 1.2 | $0 \rightarrow 5^1; 6^2; 9^2$           |
|      | 4.356 | 1.0 | $0 \rightarrow 3^1; 5^1; 7^1; 9^1$      |
|      | 4.360 | 1.2 | $0 \rightarrow 5^2; 7^1; 8^1$           |
|      | 4.366 | 1.8 | $0 \rightarrow 5^2; 6^1; 9^2$           |
|      | 4.373 | 1.1 | $0 \rightarrow 5^2; 6^1; 8^1$           |
|      | 4.378 | 1.1 | $0 \rightarrow 5^1; 7^2; 8^1; 9^1$      |
| 4.39 | 4.383 | 1.3 | $0 \rightarrow 5^1; 6^1; 7^1; 9^3$      |
|      | 4.390 | 2.2 | $0 \rightarrow 5^1; 6^1; 7^1; 8^1; 9^1$ |
|      | 4.401 | 1.6 | $0 \rightarrow 5^2; 7^1; 8^1; 9^1$      |
|      | 4.402 | 1.4 | $0 \rightarrow 5^2; 6^1; 7^1$           |
|      | 4.414 | 1.4 | $0 \rightarrow 5^2; 6^1; 8^1; 9^1$      |
|      | 4.419 | 1.3 | $0 \rightarrow 5^1; 6^1; 7^2; 9^1$      |

**Table S7.** Vibrational progression assignments for the absorption band I (3.7 - 4.6 eV) of 5-bromopyrimidine. From left to right, energies (in eV) of the experimental peak, and computed energies (in eV), intensities (in arbitrary units), and characters of the most important vibronic transitions between  $S_0$  and  $S_1$  electronic states. Several more transitions take place, however here we only show those with intensities larger than 2.0.

|      |       |      |                                        |
|------|-------|------|----------------------------------------|
| 3.79 | 3.768 | 2.3  | $11^1 \rightarrow 23^1$                |
|      | 3.785 | 3.1  | $16^2 \rightarrow 24^2$                |
|      | 3.786 | 7.9  | $16^1 \rightarrow 24^1$                |
|      | 3.787 | 2.7  | $9^1 \rightarrow 15^1$                 |
|      | 3.787 | 2.4  | $24^1;16^1 \rightarrow 16^1;24^1$      |
|      | 3.787 | 20.1 | $0 \rightarrow 0$                      |
|      | 3.788 | 6.0  | $24^1 \rightarrow 16^1$                |
| 3.83 | 3.827 | 4.5  | $0 \rightarrow 15^1$                   |
|      | 3.843 | 2.4  | $0 \rightarrow 17^2$                   |
|      | 3.855 | 2.7  | $11^1 \rightarrow 14^1;23^1$           |
| 3.87 | 3.873 | 3.7  | $16^2 \rightarrow 14^1;24^2$           |
|      | 3.874 | 9.3  | $16^1 \rightarrow 14^1;24^1$           |
|      | 3.874 | 3.1  | $9^1 \rightarrow 14^1;15^1$            |
|      | 3.874 | 2.8  | $24^1;16^1 \rightarrow 14^1;16^1;24^1$ |
|      | 3.875 | 3.2  | $16^1 \rightarrow 13^1;24^1$           |
|      | 3.875 | 23.7 | $0 \rightarrow 14^1$                   |
|      | 3.875 | 7.0  | $24^1 \rightarrow 14^1;16^1$           |
|      | 3.876 | 2.1  | $24^2 \rightarrow 14^1;16^2$           |
|      | 3.876 | 8.0  | $0 \rightarrow 13^1$                   |
|      | 3.876 | 2.4  | $24^1 \rightarrow 13^1;16^1$           |
|      | 3.889 | 2.3  | $11^1 \rightarrow 12^1;23^1$           |
| 3.91 | 3.903 | 2.2  | $0 \rightarrow 13^1;17^1$              |
|      | 3.906 | 3.2  | $16^2 \rightarrow 12^1;24^2$           |
|      | 3.907 | 8.1  | $16^1 \rightarrow 12^1;24^1$           |
|      | 3.907 | 2.8  | $9^1 \rightarrow 12^1;15^1$            |
|      | 3.908 | 2.4  | $24^1;16^1 \rightarrow 12^1;16^1;24^1$ |
|      | 3.908 | 20.5 | $0 \rightarrow 12^1$                   |
|      | 3.909 | 6.1  | $24^1 \rightarrow 12^1;16^1$           |
|      | 3.915 | 5.0  | $0 \rightarrow 14^1;15^1$              |
|      | 3.915 | 4.1  | $16^1 \rightarrow 11^1;24^1$           |
|      | 3.916 | 2.1  | $0 \rightarrow 13^1;15^1$              |
|      | 3.916 | 10.3 | $0 \rightarrow 11^1$                   |
|      | 3.917 | 3.1  | $24^1 \rightarrow 11^1;16^1$           |
|      | 3.920 | 3.5  | $16^1 \rightarrow 10^1;24^1$           |
|      | 3.921 | 8.9  | $0 \rightarrow 10^1$                   |

|      |       |      |                                                 |
|------|-------|------|-------------------------------------------------|
|      | 3.922 | 2.7  | $24^1 \rightarrow 10^1; 16^1$                   |
|      | 3.929 | 2.7  | $16^1 \rightarrow 9^1; 24^1$                    |
|      | 3.930 | 3.2  | $0 \rightarrow 14^1; 17^2$                      |
|      | 3.930 | 7.0  | $0 \rightarrow 9^1$                             |
|      | 3.931 | 2.1  | $24^1 \rightarrow 9^1; 16^1$                    |
|      | 3.948 | 4.7  | $0 \rightarrow 12^1; 15^1$                      |
| 3.96 | 3.956 | 2.3  | $0 \rightarrow 11^1; 15^1$                      |
|      | 3.961 | 4.9  | $16^1 \rightarrow 14^2; 24^1$                   |
|      | 3.962 | 4.5  | $16^1 \rightarrow 13^1; 14^1; 24^1$             |
|      | 3.962 | 12.5 | $0 \rightarrow 14^2$                            |
|      | 3.963 | 3.7  | $24^1 \rightarrow 14^2; 16^1$                   |
|      | 3.963 | 2.4  | $0 \rightarrow 12^1; 17^2$                      |
|      | 3.963 | 11.5 | $0 \rightarrow 13^1; 14^1$                      |
|      | 3.964 | 3.4  | $24^1 \rightarrow 13^1; 14^1; 16^1$             |
|      | 3.976 | 2.7  | $11^1 \rightarrow 12^1; 14^1; 23^1$             |
|      | 3.981 | 4.2  | $0 \rightarrow 4^1$                             |
| 4.00 | 3.991 | 2.4  | $0 \rightarrow 13^1; 14^1; 17^1$                |
|      | 3.993 | 3.7  | $16^2 \rightarrow 12^1; 14^1; 24^2$             |
|      | 3.994 | 9.3  | $16^1 \rightarrow 12^1; 14^1; 24^1$             |
|      | 3.995 | 3.1  | $9^1 \rightarrow 12^1; 14^1; 15^1$              |
|      | 3.995 | 2.8  | $24^1; 16^1 \rightarrow 12^1; 14^1; 16^1; 24^1$ |
|      | 3.995 | 3.2  | $16^1 \rightarrow 12^1; 13^1; 24^1$             |
|      | 3.995 | 23.5 | $0 \rightarrow 12^1; 14^1$                      |
|      | 3.996 | 7.0  | $24^1 \rightarrow 12^1; 14^1; 16^1$             |
|      | 3.996 | 2.1  | $24^2 \rightarrow 12^1; 14^1; 16^2$             |
|      | 3.996 | 8.1  | $0 \rightarrow 12^1; 13^1$                      |
|      | 3.997 | 2.4  | $24^1 \rightarrow 12^1; 13^1; 16^1$             |
|      | 4.002 | 2.4  | $0 \rightarrow 14^2; 15^1$                      |
|      | 4.003 | 4.8  | $16^1 \rightarrow 11^1; 14^1; 24^1$             |
|      | 4.003 | 2.7  | $0 \rightarrow 13^1; 14^1; 15^1$                |
|      | 4.004 | 12.1 | $0 \rightarrow 11^1; 14^1$                      |
|      | 4.004 | 3.6  | $24^1 \rightarrow 11^1; 14^1; 16^1$             |
|      | 4.005 | 3.8  | $0 \rightarrow 11^1; 13^1$                      |
|      | 4.008 | 4.1  | $16^1 \rightarrow 10^1; 14^1; 24^1$             |
|      | 4.009 | 10.4 | $0 \rightarrow 10^1; 14^1$                      |
|      | 4.009 | 3.1  | $24^1 \rightarrow 10^1; 14^1; 16^1$             |
|      | 4.010 | 3.7  | $0 \rightarrow 10^1; 13^1$                      |
|      | 4.017 | 3.2  | $16^1 \rightarrow 9^1; 14^1; 24^1$              |
|      | 4.018 | 8.0  | $0 \rightarrow 9^1; 14^1$                       |
|      | 4.018 | 2.4  | $24^1 \rightarrow 9^1; 14^1; 16^1$              |
|      | 4.019 | 3.1  | $0 \rightarrow 9^1; 13^1$                       |
|      | 4.024 | 2.3  | $0 \rightarrow 12^1; 13^1; 17^1$                |

|      |       |      |                                           |
|------|-------|------|-------------------------------------------|
|      | 4.028 | 3.9  | $16^1 \rightarrow 12^2; 24^1$             |
|      | 4.029 | 9.9  | $0 \rightarrow 12^2$                      |
|      | 4.029 | 2.9  | $24^1 \rightarrow 12^2; 16^1$             |
| 4.04 | 4.035 | 4.9  | $0 \rightarrow 12^1; 14^1; 15^1$          |
|      | 4.036 | 4.2  | $16^1 \rightarrow 11^1; 12^1; 24^1$       |
|      | 4.036 | 2.1  | $0 \rightarrow 12^1; 13^1; 15^1$          |
|      | 4.037 | 10.6 | $0 \rightarrow 11^1; 12^1$                |
|      | 4.037 | 3.2  | $24^1 \rightarrow 11^1; 12^1; 16^1$       |
|      | 4.041 | 3.6  | $16^1 \rightarrow 10^1; 12^1; 24^1$       |
|      | 4.042 | 9.1  | $0 \rightarrow 10^1; 12^1$                |
|      | 4.042 | 2.7  | $24^1 \rightarrow 10^1; 12^1; 16^1$       |
|      | 4.043 | 2.5  | $0 \rightarrow 11^1; 14^1; 15^1$          |
|      | 4.048 | 2.1  | $0 \rightarrow 10^1; 14^1; 15^1$          |
|      | 4.050 | 2.8  | $16^1 \rightarrow 9^1; 12^1; 24^1$        |
|      | 4.050 | 2.9  | $16^1 \rightarrow 13^1; 14^2; 24^1$       |
|      | 4.050 | 3.8  | $0 \rightarrow 14^3$                      |
|      | 4.050 | 4.9  | $0 \rightarrow 10^1; 11^1$                |
|      | 4.051 | 3.2  | $0 \rightarrow 12^1; 14^1; 17^2$          |
|      | 4.051 | 7.1  | $0 \rightarrow 9^1; 12^1$                 |
|      | 4.051 | 7.3  | $0 \rightarrow 13^1; 14^2$                |
|      | 4.051 | 2.1  | $24^1 \rightarrow 9^1; 12^1; 16^1$        |
|      | 4.051 | 2.2  | $24^1 \rightarrow 13^1; 14^2; 16^1$       |
|      | 4.059 | 3.8  | $0 \rightarrow 9^1; 11^1$                 |
|      | 4.064 | 2.9  | $0 \rightarrow 9^1; 10^1$                 |
|      | 4.068 | 5.0  | $0 \rightarrow 4^1; 14^1$                 |
|      | 4.068 | 2.2  | $0 \rightarrow 12^2; 15^1$                |
|      | 4.077 | 2.4  | $0 \rightarrow 11^1; 12^1; 15^1$          |
| 4.08 | 4.081 | 2.0  | $0 \rightarrow 10^1; 12^1; 15^1$          |
|      | 4.082 | 4.7  | $16^1 \rightarrow 12^1; 14^2; 24^1$       |
|      | 4.083 | 4.4  | $16^1 \rightarrow 12^1; 13^1; 14^1; 24^1$ |
|      | 4.083 | 12.0 | $0 \rightarrow 12^1; 14^2$                |
|      | 4.083 | 3.6  | $24^1 \rightarrow 12^1; 14^2; 16^1$       |
|      | 4.084 | 11.3 | $0 \rightarrow 12^1; 13^1; 14^1$          |
|      | 4.084 | 3.4  | $24^1 \rightarrow 12^1; 13^1; 14^1; 16^1$ |
|      | 4.090 | 2.5  | $16^1 \rightarrow 11^1; 14^2; 24^1$       |
|      | 4.091 | 2.2  | $16^1 \rightarrow 11^1; 13^1; 14^1; 24^1$ |
|      | 4.091 | 6.3  | $0 \rightarrow 11^1; 14^2$                |
|      | 4.092 | 5.5  | $0 \rightarrow 11^1; 13^1; 14^1$          |
|      | 4.095 | 2.2  | $16^1 \rightarrow 10^1; 14^2; 24^1$       |
|      | 4.096 | 2.1  | $16^1 \rightarrow 10^1; 13^1; 14^1; 24^1$ |
|      | 4.096 | 5.5  | $0 \rightarrow 10^1; 14^2$                |
|      | 4.097 | 5.3  | $0 \rightarrow 10^1; 13^1; 14^1$          |

|       |       |                                               |
|-------|-------|-----------------------------------------------|
| 4.101 | 4.4   | $0 \rightarrow 4^1; 12^1$                     |
| 4.105 | 4.1   | $0 \rightarrow 9^1; 14^2$                     |
| 4.106 | 4.4   | $0 \rightarrow 9^1; 13^1; 14^1$               |
| 4.111 | 2.3   | $0 \rightarrow 12^1; 13^1; 14^1; 17^1$        |
| 4.115 | 4.4   | $16^1 \rightarrow 12^2; 14^1; 24^1$           |
| 4.116 | 11.1  | $0 \rightarrow 12^2; 14^1$                    |
| 4.117 | 3.3   | $24^1 \rightarrow 12^2; 14^1; 16^1$           |
| 4.117 | 3.8   | $0 \rightarrow 12^2; 13^1$                    |
|       |       |                                               |
| 4.12  | 4.123 | 2.3 $0 \rightarrow 12^1; 14^2; 15^1$          |
|       | 4.123 | 4.8 $16^1 \rightarrow 11^1; 12^1; 14^1; 24^1$ |
|       | 4.124 | 2.7 $0 \rightarrow 12^1; 13^1; 14^1; 15^1$    |
|       | 4.124 | 12.1 $0 \rightarrow 11^1; 12^1; 14^1$         |
|       | 4.125 | 3.6 $24^1 \rightarrow 11^1; 12^1; 14^1; 16^1$ |
|       | 4.125 | 3.9 $0 \rightarrow 11^1; 12^1; 13^1$          |
|       | 4.128 | 4.1 $16^1 \rightarrow 10^1; 12^1; 14^1; 24^1$ |
|       | 4.129 | 10.3 $0 \rightarrow 10^1; 12^1; 14^1$         |
|       | 4.130 | 3.1 $24^1 \rightarrow 10^1; 12^1; 14^1; 16^1$ |
|       | 4.130 | 3.7 $0 \rightarrow 10^1; 12^1; 13^1$          |
|       | 4.133 | 2.2 $0 \rightarrow 11^2; 14^1$                |
|       | 4.137 | 2.3 $16^1 \rightarrow 10^1; 11^1; 14^1; 24^1$ |
|       | 4.137 | 3.1 $16^1 \rightarrow 9^1; 12^1; 14^1; 24^1$  |
|       | 4.138 | 5.7 $0 \rightarrow 10^1; 11^1; 14^1$          |
|       | 4.138 | 8.0 $0 \rightarrow 9^1; 12^1; 14^1$           |
|       | 4.138 | 2.8 $0 \rightarrow 13^1; 14^3$                |
|       | 4.139 | 2.4 $24^1 \rightarrow 9^1; 12^1; 14^1; 16^1$  |
|       | 4.139 | 3.2 $0 \rightarrow 9^1; 12^1; 13^1$           |
|       | 4.142 | 2.0 $0 \rightarrow 10^2; 14^1$                |
|       | 4.146 | 4.4 $0 \rightarrow 9^1; 11^1; 14^1$           |
|       | 4.149 | 3.0 $0 \rightarrow 12^3$                      |
|       | 4.151 | 3.4 $0 \rightarrow 9^1; 10^1; 14^1$           |
|       | 4.155 | 2.7 $0 \rightarrow 4^1; 14^2$                 |
|       | 4.156 | 2.3 $0 \rightarrow 12^2; 14^1; 15^1$          |
|       | 4.156 | 2.2 $0 \rightarrow 4^1; 13^1; 14^1$           |
|       | 4.157 | 2.0 $16^1 \rightarrow 11^1; 12^2; 24^1$       |
|       | 4.158 | 5.2 $0 \rightarrow 11^1; 12^2$                |
|       | 4.162 | 4.3 $0 \rightarrow 10^1; 12^2$                |
|       | 4.164 | 2.5 $0 \rightarrow 11^1; 12^1; 14^1; 15^1$    |
|       |       |                                               |
| 4.17  | 4.169 | 2.1 $0 \rightarrow 10^1; 12^1; 14^1; 15^1$    |
|       | 4.170 | 2.8 $16^1 \rightarrow 12^1; 13^1; 14^2; 24^1$ |
|       | 4.170 | 3.6 $0 \rightarrow 12^1; 14^3$                |
|       | 4.171 | 5.1 $0 \rightarrow 10^1; 11^1; 12^1$          |
|       | 4.171 | 3.4 $0 \rightarrow 9^1; 12^2$                 |

|       |       |                                                     |
|-------|-------|-----------------------------------------------------|
| 4.171 | 7.0   | $0 \rightarrow 12^1; 13^1; 14^2$                    |
| 4.172 | 2.1   | $24^1 \rightarrow 12^1; 13^1; 14^2; 16^1$           |
| 4.180 | 3.9   | $0 \rightarrow 9^1; 11^1; 12^1$                     |
| 4.180 | 3.5   | $0 \rightarrow 11^1; 13^1; 14^2$                    |
| 4.184 | 3.0   | $0 \rightarrow 9^1; 10^1; 12^1$                     |
| 4.184 | 3.3   | $0 \rightarrow 10^1; 13^1; 14^2$                    |
| 4.188 | 2.0   | $16^1 \rightarrow 4^1; 12^1; 14^1; 24^1$            |
| 4.189 | 5.1   | $0 \rightarrow 4^1; 12^1; 14^1$                     |
| 4.193 | 2.7   | $0 \rightarrow 9^1; 13^1; 14^2$                     |
| 4.197 | 2.2   | $0 \rightarrow 4^1; 11^1; 14^1$                     |
| 4.202 | 2.2   | $16^1 \rightarrow 12^2; 14^2; 24^1$                 |
| 4.203 | 2.1   | $16^1 \rightarrow 12^2; 13^1; 14^1; 24^1$           |
| 4.204 | 5.5   | $0 \rightarrow 12^2; 14^2$                          |
| 4.204 | 5.3   | $0 \rightarrow 12^2; 13^1; 14^1$                    |
|       |       |                                                     |
| 4.21  | 4.211 | 2.4 $16^1 \rightarrow 11^1; 12^1; 14^2; 24^1$       |
|       | 4.212 | 2.1 $16^1 \rightarrow 11^1; 12^1; 13^1; 14^1; 24^1$ |
|       | 4.212 | 6.2 $0 \rightarrow 11^1; 12^1; 14^2$                |
|       | 4.213 | 5.4 $0 \rightarrow 11^1; 12^1; 13^1; 14^1$          |
|       | 4.216 | 2.1 $16^1 \rightarrow 10^1; 12^1; 14^2; 24^1$       |
|       | 4.217 | 2.0 $16^1 \rightarrow 10^1; 12^1; 13^1; 14^1; 24^1$ |
|       | 4.217 | 5.3 $0 \rightarrow 10^1; 12^1; 14^2$                |
|       | 4.218 | 5.1 $0 \rightarrow 10^1; 12^1; 13^1; 14^1$          |
|       | 4.222 | 2.2 $0 \rightarrow 4^1; 12^2$                       |
|       | 4.225 | 3.0 $0 \rightarrow 10^1; 11^1; 14^2$                |
|       | 4.226 | 4.0 $0 \rightarrow 9^1; 12^1; 14^2$                 |
|       | 4.226 | 2.7 $0 \rightarrow 10^1; 11^1; 13^1; 14^1$          |
|       | 4.227 | 4.3 $0 \rightarrow 9^1; 12^1; 13^1; 14^1$           |
|       | 4.234 | 2.2 $0 \rightarrow 9^1; 11^1; 14^2$                 |
|       | 4.235 | 2.2 $0 \rightarrow 9^1; 11^1; 13^1; 14^1$           |
|       | 4.237 | 3.2 $0 \rightarrow 12^3; 14^1$                      |
|       | 4.244 | 2.3 $16^1 \rightarrow 11^1; 12^2; 14^1; 24^1$       |
|       | 4.245 | 5.8 $0 \rightarrow 11^1; 12^2; 14^1$                |
|       |       |                                                     |
| 4.25  | 4.250 | 4.8 $0 \rightarrow 10^1; 12^2; 14^1$                |
|       | 4.253 | 2.2 $0 \rightarrow 11^2; 12^1; 14^1$                |
|       | 4.257 | 2.3 $16^1 \rightarrow 10^1; 11^1; 12^1; 14^1; 24^1$ |
|       | 4.258 | 5.7 $0 \rightarrow 10^1; 11^1; 12^1; 14^1$          |
|       | 4.259 | 3.8 $0 \rightarrow 9^1; 12^2; 14^1$                 |
|       | 4.259 | 2.6 $0 \rightarrow 12^1; 13^1; 14^3$                |
|       | 4.267 | 4.4 $0 \rightarrow 9^1; 11^1; 12^1; 14^1$           |
|       | 4.272 | 3.3 $0 \rightarrow 9^1; 10^1; 12^1; 14^1$           |
|       | 4.276 | 2.7 $0 \rightarrow 4^1; 12^1; 14^2$                 |
|       | 4.277 | 2.2 $0 \rightarrow 4^1; 12^1; 13^1; 14^1$           |

|      |       |     |                                              |
|------|-------|-----|----------------------------------------------|
|      | 4.291 | 2.4 | $0 \rightarrow 10^1; 11^1; 12^2$             |
|      | 4.292 | 3.2 | $0 \rightarrow 12^2; 13^1; 14^2$             |
| 4.29 | 4.300 | 3.4 | $0 \rightarrow 11^1; 12^1; 13^1; 14^2$       |
|      | 4.305 | 3.2 | $0 \rightarrow 10^1; 12^1; 13^1; 14^2$       |
|      | 4.309 | 2.5 | $0 \rightarrow 4^1; 12^2; 14^1$              |
|      | 4.314 | 2.6 | $0 \rightarrow 9^1; 12^1; 13^1; 14^2$        |
|      | 4.317 | 2.3 | $0 \rightarrow 4^1; 11^1; 12^1; 14^1$        |
|      | 4.332 | 2.9 | $0 \rightarrow 11^1; 12^2; 14^2$             |
|      | 4.333 | 2.6 | $0 \rightarrow 11^1; 12^2; 13^1; 14^1$       |
|      | 4.337 | 2.4 | $0 \rightarrow 10^1; 12^2; 14^2$             |
|      | 4.338 | 2.4 | $0 \rightarrow 10^1; 12^2; 13^1; 14^1$       |
| 4.33 | 4.346 | 2.9 | $0 \rightarrow 10^1; 11^1; 12^1; 14^2$       |
|      | 4.347 | 2.7 | $0 \rightarrow 10^1; 11^1; 12^1; 13^1; 14^1$ |
|      | 4.354 | 2.2 | $0 \rightarrow 9^1; 11^1; 12^1; 14^2$        |
|      | 4.355 | 2.2 | $0 \rightarrow 9^1; 11^1; 12^1; 13^1; 14^1$  |
|      | 4.379 | 2.7 | $0 \rightarrow 10^1; 11^1; 12^2; 14^1$       |
| 4.38 | 4.388 | 2.1 | $0 \rightarrow 9^1; 11^1; 12^2; 14^1$        |
